# Supplementary material
Source: PubMed Central journal article supplement (PMC9724991)
Supplement: EIJ-D-20-00552_Wilkins_SD.pdf [file EIJ-D-20-00552_Wilkins_SD.pdf]

**Supplementary Table 1. Exclusion criteria.**

| <b>Clinical exclusion criteria</b>                                                                                                                                                                                                                                                                                                     |
|----------------------------------------------------------------------------------------------------------------------------------------------------------------------------------------------------------------------------------------------------------------------------------------------------------------------------------------|
| 1. Requires long-term oral anticoagulation therapy for any indication other than atrial fibrillation                                                                                                                                                                                                                                   |
| 2. Contraindicated for or allergic to aspirin, clopidogrel, warfarin or novel oral anticoagulant (NOAC) use                                                                                                                                                                                                                            |
| 3. History of surgical atrial septal defect (ASD) repair or has an ASD closure device implanted                                                                                                                                                                                                                                        |
| 4. History of surgical patent foramen ovale (PFO) repair or has a PFO closure device implanted                                                                                                                                                                                                                                         |
| 5. Implanted with a mechanical heart valve prosthesis requiring long-term oral anticoagulation                                                                                                                                                                                                                                         |
| 6. Has any contraindications for a percutaneous catheterisation procedure (e.g., unable to accommodate transoesophageal echocardiogram [TEE/TOE] probe or required catheters, or subject has active infection or bleeding disorder)                                                                                                    |
| 7. Stroke or transient ischaemic attack (TIA) within 90 days prior to implant procedure                                                                                                                                                                                                                                                |
| 8. Underwent any cardiac or non-cardiac intervention or surgery within 30 days prior to implant, or intervention or surgery is planned within 60 days after implant procedure                                                                                                                                                          |
| 9. Myocardial infarction (MI) within 90 days prior to implant                                                                                                                                                                                                                                                                          |
| 10. New York Heart Association Class IV congestive heart failure                                                                                                                                                                                                                                                                       |
| 11. Left ventricular ejection fraction (LVEF) <30%                                                                                                                                                                                                                                                                                     |
| 12. Symptomatic carotid artery disease (defined as >50% reduced diameter with symptoms of ipsilateral transient or visual TIA evidenced by amaurosis fugax, ipsilateral hemispheric TIAs or ipsilateral stroke); if subject has a history of carotid stent or endarterectomy the subject is eligible if there is >50% reduced diameter |
| 13. Reversible cause of AF (i.e., secondary thyroid disorders, acute alcohol intoxication, trauma, recent major surgical procedures)                                                                                                                                                                                                   |
| 14. History of idiopathic or recurrent venous thromboembolism requiring long-term oral anticoagulation                                                                                                                                                                                                                                 |
| 15. Left atrial appendage is obliterated or surgically ligated                                                                                                                                                                                                                                                                         |
| 16. Resting heart rate >110 bpm                                                                                                                                                                                                                                                                                                        |
| 17. Thrombocytopenia (defined as <70,000 platelets/mm <sup>3</sup> ) or anaemia with haemoglobin concentration of <10 g/dl (i.e., anaemia as determined by the investigator which would require transfusion)                                                                                                                           |

|                                                                                                                                                                                                                                                                                                                                                      |
|------------------------------------------------------------------------------------------------------------------------------------------------------------------------------------------------------------------------------------------------------------------------------------------------------------------------------------------------------|
| 18. Actively enrolled or plans to enrol in a concurrent clinical study in which the active treatment arm may confound the results of this trial                                                                                                                                                                                                      |
| 19. Active endocarditis or other infection producing bacteraemia                                                                                                                                                                                                                                                                                     |
| 20. Subject has a known malignancy or other illness where life expectancy is less than 2 years                                                                                                                                                                                                                                                       |
| 21. Impaired renal function with eGFR <40 ml/min/1.73 m <sup>2</sup>                                                                                                                                                                                                                                                                                 |
| 22. Patient with more than mild hepatic failure as per Munich consensus document                                                                                                                                                                                                                                                                     |
|                                                                                                                                                                                                                                                                                                                                                      |
| <b>Cardiac imaging exclusion criteria</b>                                                                                                                                                                                                                                                                                                            |
|                                                                                                                                                                                                                                                                                                                                                      |
| 1. Intracardiac thrombus – including LAA - visualised by echocardiographic imaging                                                                                                                                                                                                                                                                   |
| 2. Existing circumferential pericardial effusion >2 mm                                                                                                                                                                                                                                                                                               |
| 3. Significant mitral valve stenosis (i.e., mitral valve area <1.5 cm <sup>2</sup> )                                                                                                                                                                                                                                                                 |
| 4. High-risk patent foramen ovale (PFO), defined as an atrial septal aneurysm (atrial septal excursion >15 mm; excursion defined as maximal protrusion of the ASA beyond the plane of the atrial septum during cardiac cycle) or large shunt (substantial passage of bubbles, i.e., >20, within 3 cardiac cycles from appearing in the right atrium) |
| 5. Complex atheroma with mobile plaque of the descending aorta and/or aortic arch                                                                                                                                                                                                                                                                    |
| 6. Cardiac tumour                                                                                                                                                                                                                                                                                                                                    |
| 7. LAA anatomy cannot accommodate an Omega device (as per IFU)                                                                                                                                                                                                                                                                                       |
| 8. Placement of the device would interfere with any intracardiac or intravascular structure                                                                                                                                                                                                                                                          |
